# Supplementary material for: Spatial Distribution and Determinants of Aboveground Biomass in a Subalpine Coniferous Forest in Southwestern China
Source: MDPI journal article supplement (doi:10.3390/f14112197), 2023-11-04
Supplement: s1 [file s1]

Supplementary materials

**Spatial distribution and determinants of aboveground biomass in a subalpine coniferous forest in southwestern China**

Xiaofeng Ni<sup>1</sup>, Xinyu Xiong<sup>1</sup>, Qiong Cai<sup>1</sup>, Fan Fan<sup>1,2</sup>, Chenqi He<sup>1</sup>, Chengjun Ji<sup>1</sup>, Sheng Li<sup>2</sup>, Xiaoli Shen<sup>3</sup> and Jiangling Zhu<sup>1,\*</sup>

<sup>1</sup> Institute of Ecology, and Key Laboratory for Earth Surface Processes of the Ministry of Education, College of Urban and Environmental Sciences, Peking University, Beijing 100871, China; nixiaofeng@pku.edu.cn (X.N.)

<sup>2</sup> School of Life Sciences, Peking University, Beijing 100871, China

<sup>3</sup> State Key Laboratory of Vegetation and Environmental Change, Institute of Botany, Chinese Academy of Sciences, Beijing 100093, China

\* Correspondence: jlzhu@urban.pku.edu.cn

**Table S1.** Woody plant list in the Wanglang Plot.

| No. | Species                                                | Genus                 | Family         | Number of subplots |
|-----|--------------------------------------------------------|-----------------------|----------------|--------------------|
| 1   | <i>Abies faxoniana</i>                                 | <i>Abies</i>          | Pinaceae       | 611                |
| 2   | <i>Acanthopanax giraldii</i>                           | <i>Acanthopanax</i>   | Araliaceae     | 131                |
| 3   | <i>Acer caesium</i> subsp. <i>giraldii</i>             | <i>Acer</i>           | Sapindaceae    | 60                 |
| 4   | <i>Acer caudatum</i> var. <i>prattii</i>               | <i>Acer</i>           | Sapindaceae    | 445                |
| 5   | <i>Acer maximowiczii</i>                               | <i>Acer</i>           | Sapindaceae    | 2                  |
| 6   | <i>Berberis dictyoneura</i>                            | <i>Berberis</i>       | Berberidaceae  | 2                  |
| 7   | <i>Berberis silvataroucana</i>                         | <i>Berberis</i>       | Berberidaceae  | 254                |
| 8   | <i>Betula albosinensis</i>                             | <i>Betula</i>         | Betulaceae     | 454                |
| 9   | <i>Cerasus trichostoma</i>                             | <i>Cerasus</i>        | Rosaceae       | 423                |
| 10  | <i>Clematis gracilifolia</i>                           | <i>Clematis</i>       | Ranunculaceae  | 180                |
| 11  | <i>Clematis pogonandra</i>                             | <i>Clematis</i>       | Ranunculaceae  | 7                  |
| 12  | <i>Clematoclethra actinidioides</i>                    | <i>Clematoclethra</i> | Actinidiaceae  | 268                |
| 13  | <i>Clematoclethra faberi</i>                           | <i>Clematoclethra</i> | Actinidiaceae  | 54                 |
| 14  | <i>Cotoneaster acutifolius</i>                         | <i>Cotoneaster</i>    | Rosaceae       | 48                 |
| 15  | <i>Euonymus porphyreus</i>                             | <i>Euonymus</i>       | Celastraceae   | 585                |
| 16  | <i>Hydrangea xanthoneura</i> var. <i>setchuenensis</i> | <i>Hydrangea</i>      | Hydrangeaceae  | 4                  |
| 17  | <i>Juniperus formosana</i>                             | <i>Juniperus</i>      | Cupressaceae   | 2                  |
| 18  | <i>Lonicera caerulea</i>                               | <i>Lonicera</i>       | Caprifoliaceae | 335                |
| 19  | <i>Lonicera hispida</i>                                | <i>Lonicera</i>       | Caprifoliaceae | 120                |
| 20  | <i>Lonicera nervosa</i>                                | <i>Lonicera</i>       | Caprifoliaceae | 617                |
| 21  | <i>Lonicera tangutica</i>                              | <i>Lonicera</i>       | Caprifoliaceae | 541                |
| 22  | <i>Lonicera trichosantha</i> var. <i>xerocalyx</i>     | <i>Lonicera</i>       | Caprifoliaceae | 284                |
| 23  | <i>Lonicera webbiana</i>                               | <i>Lonicera</i>       | Caprifoliaceae | 470                |
| 24  | <i>Maddenia incisoserrata</i>                          | <i>Maddenia</i>       | Rosaceae       | 284                |
| 25  | <i>Padus obtusata</i>                                  | <i>Padus</i>          | Rosaceae       | 156                |
| 26  | <i>Philadelphus purpurascens</i>                       | <i>Philadelphus</i>   | Hydrangeaceae  | 602                |
| 27  | <i>Picea purpurea</i>                                  | <i>Picea</i>          | Pinaceae       | 426                |
| 28  | <i>Populus szechuanica</i>                             | <i>Populus</i>        | Salicaceae     | 1                  |
| 29  | <i>Potentilla glabra</i>                               | <i>Potentilla</i>     | Rosaceae       | 6                  |
| 30  | <i>Rhododendron amesiae</i>                            | <i>Rhododendron</i>   | Ericaceae      | 22                 |
| 31  | <i>Rhododendron calophytum</i>                         | <i>Rhododendron</i>   | Ericaceae      | 3                  |
| 32  | <i>Rhododendron oreodoxa</i>                           | <i>Rhododendron</i>   | Ericaceae      | 85                 |
| 33  | <i>Rhododendron przewalskii</i>                        | <i>Rhododendron</i>   | Ericaceae      | 1                  |

---

|    |                              |                     |                 |     |
|----|------------------------------|---------------------|-----------------|-----|
| 34 | <i>Rhododendron rufum</i>    | <i>Rhododendron</i> | Ericaceae       | 14  |
| 35 | <i>Rhododendron watsonii</i> | <i>Rhododendron</i> | Ericaceae       | 16  |
| 36 | <i>Ribes setchuense</i>      | <i>Ribes</i>        | Grossulariaceae | 111 |
| 37 | <i>Ribes stenocarpum</i>     | <i>Ribes</i>        | Grossulariaceae | 12  |
| 38 | <i>Ribes tenue</i>           | <i>Ribes</i>        | Grossulariaceae | 465 |
| 39 | <i>Rosa moyesii</i>          | <i>Rosa</i>         | Rosaceae        | 509 |
| 40 | <i>Rosa omeiensis</i>        | <i>Rosa</i>         | Rosaceae        | 442 |
| 41 | <i>Sabina saltuaria</i>      | <i>Sabina</i>       | Cupressaceae    | 169 |
| 42 | <i>Salix cheilophila</i>     | <i>Salix</i>        | Salicaceae      | 1   |
| 43 | <i>Salix wallichiana</i>     | <i>Salix</i>        | Salicaceae      | 58  |
| 44 | <i>Salix wolong</i>          | <i>Salix</i>        | Salicaceae      | 135 |
| 45 | <i>Sorbaria arborea</i>      | <i>Sorbaria</i>     | Rosaceae        | 107 |
| 46 | <i>Sorbus koehneana</i>      | <i>Sorbus</i>       | Rosaceae        | 584 |
| 47 | <i>Spiraea rosthornii</i>    | <i>Spiraea</i>      | Rosaceae        | 1   |
| 48 | <i>Spiraea schneideriana</i> | <i>Spiraea</i>      | Rosaceae        | 24  |

---

**Table S2.** Importance value (IV) of woody plants in the Wanglang Plot.

| Family          | Mean IV | Genus                 | Mean IV |
|-----------------|---------|-----------------------|---------|
| Pinaceae        | 0.74    | <i>Abies</i>          | 0.53    |
| Rosaceae        | 0.06    | <i>Picea</i>          | 0.21    |
| Betulaceae      | 0.05    | <i>Betula</i>         | 0.05    |
| Sapindaceae     | 0.04    | <i>Acer</i>           | 0.04    |
| Salicaceae      | 0.03    | <i>Salix</i>          | 0.03    |
| Hydrangeaceae   | 0.03    | <i>Sorbus</i>         | 0.03    |
| Caprifoliaceae  | 0.02    | <i>Philadelphus</i>   | 0.03    |
| Cupressaceae    | 0.02    | <i>Lonicera</i>       | 0.02    |
| Celastraceae    | <0.001  | <i>Padus</i>          | 0.02    |
| Berberidaceae   | <0.001  | <i>Sabina</i>         | 0.02    |
| Ericaceae       | <0.001  | <i>Cerasus</i>        | 0.01    |
| Grossulariaceae | <0.001  | <i>Rosa</i>           | <0.001  |
| Araliaceae      | <0.001  | <i>Maddenia</i>       | <0.001  |
| Actinidiaceae   | <0.001  | <i>Euonymus</i>       | <0.001  |
| Ranunculaceae   | <0.001  | <i>Sorbaria</i>       | <0.001  |
|                 |         | <i>Berberis</i>       | <0.001  |
|                 |         | <i>Rhododendron</i>   | <0.001  |
|                 |         | <i>Ribes</i>          | <0.001  |
|                 |         | <i>Cotoneaster</i>    | <0.001  |
|                 |         | <i>Acanthopanax</i>   | <0.001  |
|                 |         | <i>Hydrangea</i>      | <0.001  |
|                 |         | <i>Populus</i>        | <0.001  |
|                 |         | <i>Juniperus</i>      | <0.001  |
|                 |         | <i>Clematoclethra</i> | <0.001  |
|                 |         | <i>Clematis</i>       | <0.001  |
|                 |         | <i>Spiraea</i>        | <0.001  |
|                 |         | <i>Potentilla</i>     | <0.001  |

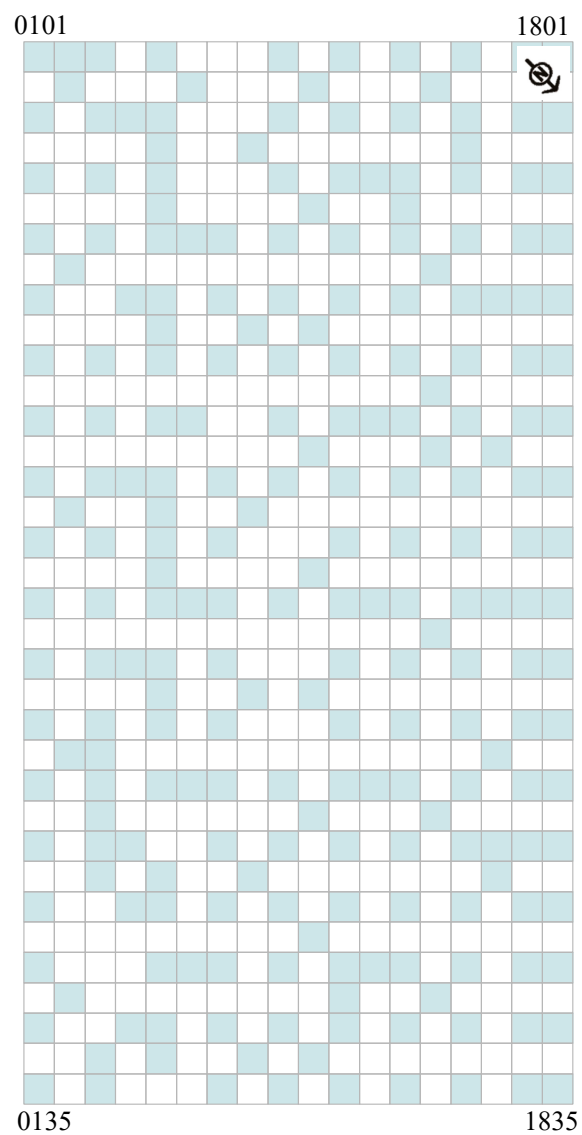

**Figure S1.** Distribution of plots investigated for soil properties.

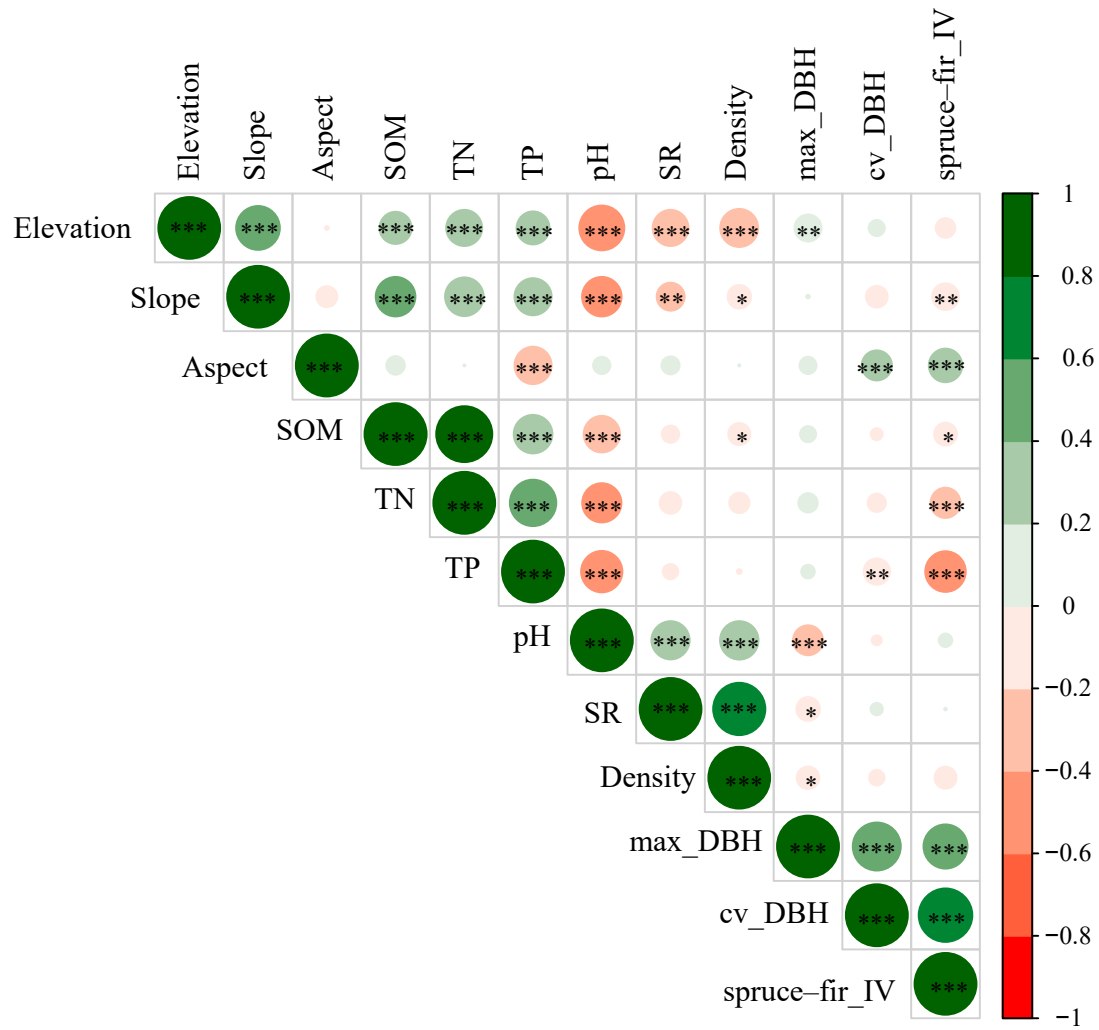

**Figure S2.** Correlations between topography, soil, and stand structure variables (N =234). The size and the color gradient of the circle represent Pearson's correlation coefficients. SOM, soil organic matter; TN, total nitrogen content; TP, total phosphorus content; SR, species richness; Density, stem density; max\_DBH, maximum DBH; cv\_DBH, DBH variance; spruce-fir\_IV, important value of spruce-fir. \* $P < 0.05$ , \*\* $P < 0.01$ , \*\*\* $P < 0.001$ .

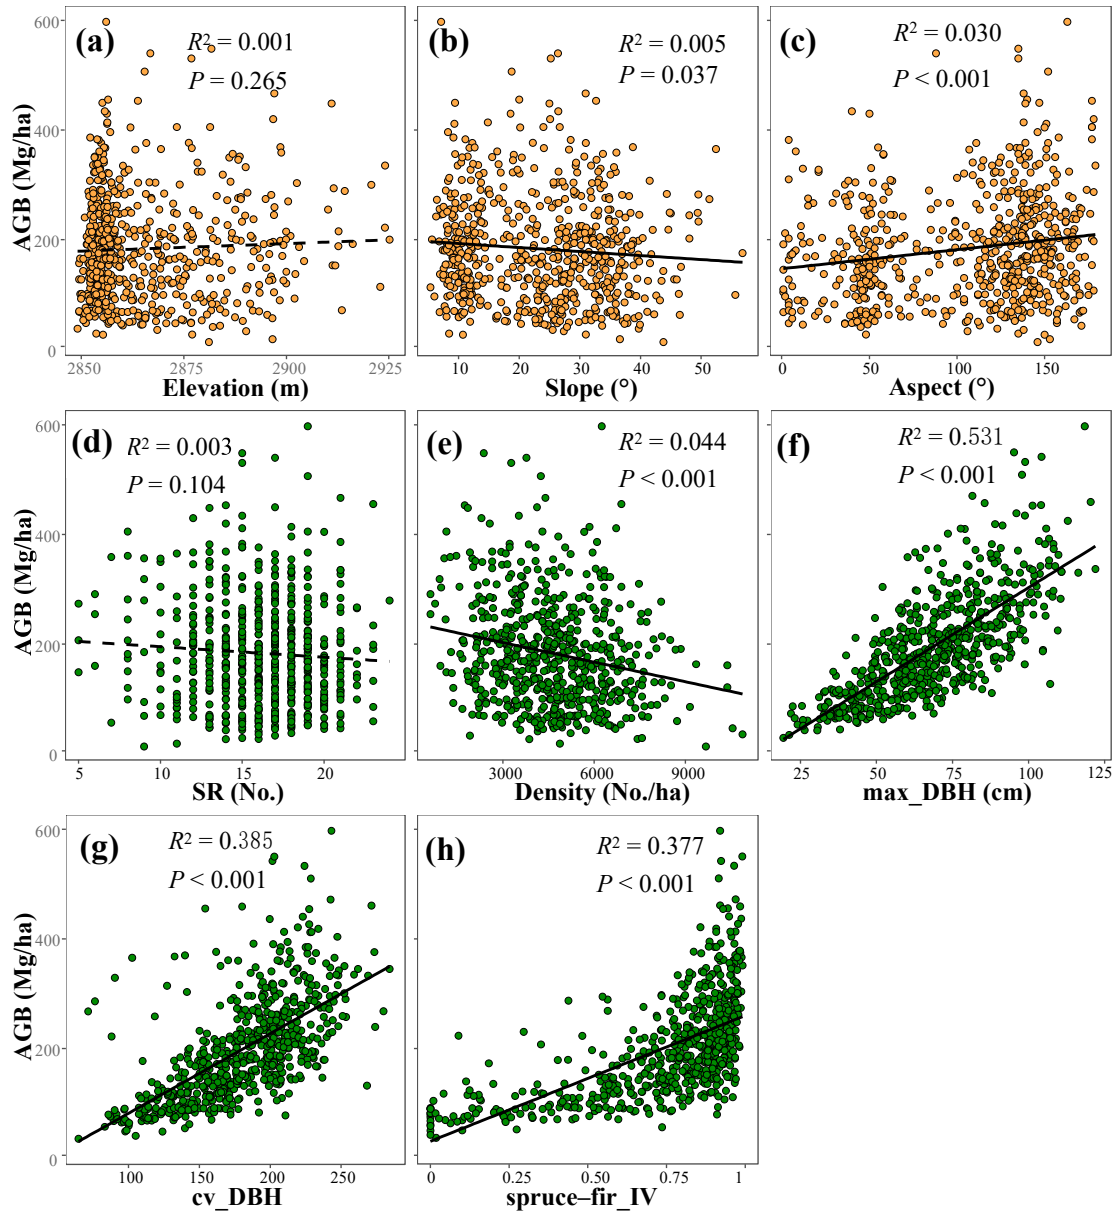

**Figure S3.** Regression relationships between forest aboveground biomass and topography, soil, and stand structure variables ( $N = 630$ ). (a) Elevation, (b) slope, (c) aspect, (d) species richness, (e) stem density, (f) maximum DBH, (g) DBH variance, and (h) important value of spruce–fir.
